# Supplementary material for: Effects of Irrigation and Fertilization on the Morpho-Physiological Traits of <em>Populus sibirica</em> Hort. Ex Tausch and <em>Ulmus pumila</em> L. In the Semi-arid Steppe Region of Mongolia
Source: Preprints.org preprint supplement (doi:10.20944/preprints202110.0154.v1), 2021-10-11
Supplement: Supplementary file 3 [file supplementary]

**Table S1.** P-values of One-way ANOVA for treatment effects on growth and morpho-physiological traits of *Populus sibirica* and *Ulmus pumila*

| **Species** | **year** | **Variables** | **DF** | **MS** | **F Value** | **Pr>F** |
| --- | --- | --- | --- | --- | --- | --- |
| *Populus sibirica* | 2018 | SLA | 9 | 379.38 | 11.77 | <.0001 |
| LA | 9 | 650.13 | 5.90 | <.0001 |
| LB | 9 | 0.04 | 3.71 | 0.0004 |
| Chlorophyll content total | 9 | 44.65 | 7.01 | <.0001 |
| Chlorophyll a/b ratio | 9 | 5.76 | 2.73 | 0.0078 |
| Water potential (13:00) | 3 | 0.18 | 5.49 | 0.0242 |
| 2019 | SLA | 9 | 140.63 | 1.96 | 0.0515 |
| LA | 9 | 0.12 | 4.93 | <.0001 |
| LB | 9 | 1409.28 | 4.47 | <.0001 |
| Chlorophyll content total | 9 | 49.69 | 8.06 | <.0001 |
| Chlorophyll a/b ratio | 9 | 1.35 | 7.29 | <.0001 |
| Water potential (13:00) | 3 | 0.03 | 3.06 | 0.0914 |
| *Ulmus pumila* | 2018 | SLA | 9 | 347.03 | 8.00 | <.0001 |
| LA | 9 | 44.57 | 4.01 | 0.0002 |
| LB | 9 | 0.004 | 3.39 | 0.0011 |
| Chlorophyll content total | 9 | 44.11 | 14.81 | <.0001 |
| Chlorophyll a/b ratio | 9 | 8.12 | 2.01 | 0.0502 |
| Water potential (13:00) | 3 | 0.02 | 0.90 | 0.4817 |
| 2019 | SLA | 9 | 1473.64 | 14.14 | <.0001 |
| LA | 9 | 0.006 | 5.01 | <.0001 |
| LB | 9 | 65.14 | 7.67 | <.0001 |
| Chlorophyll content total | 9 | 79.28 | 21.77 | <.0001 |
| Chlorophyll a/b ratio | 9 | 0.305 | 8.41 | <.0001 |
| Water potential (13:00) | 3 | 0.108 | 3.70 | 0.0616 |
